# Supplementary material
Source: PubMed Central journal article supplement (PMC3023503)

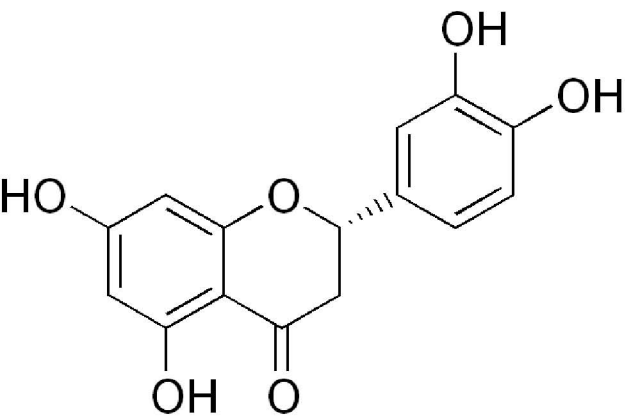

eriodictyol

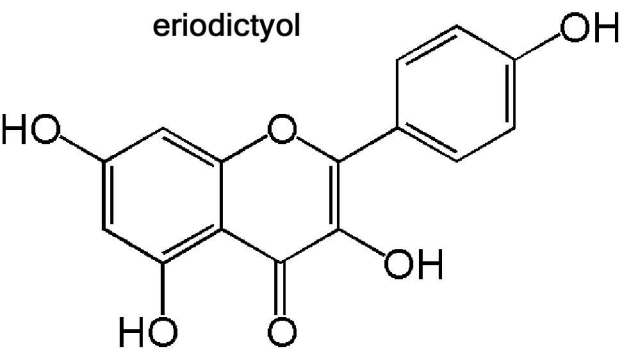

kaempferol

Supplement: supp_M110.147306_jbc.M110.147306-1.pdf [file supp_M110.147306_jbc.M110.147306-1.pdf]

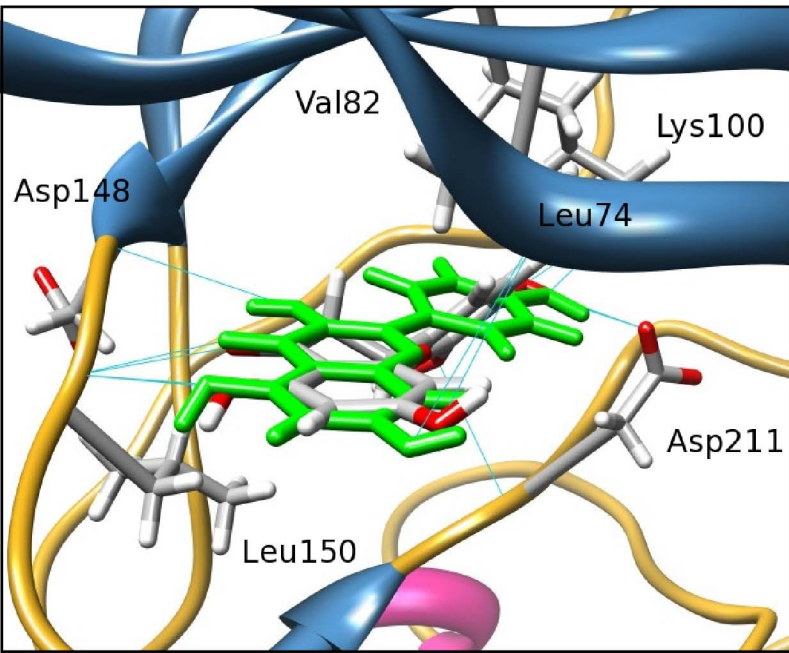

Supplement: supp_M110.147306_jbc.M110.147306-2.pdf [file supp_M110.147306_jbc.M110.147306-2.pdf]

A

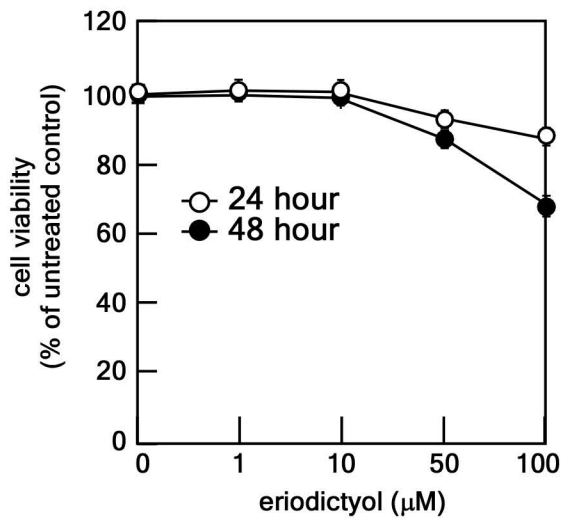

B

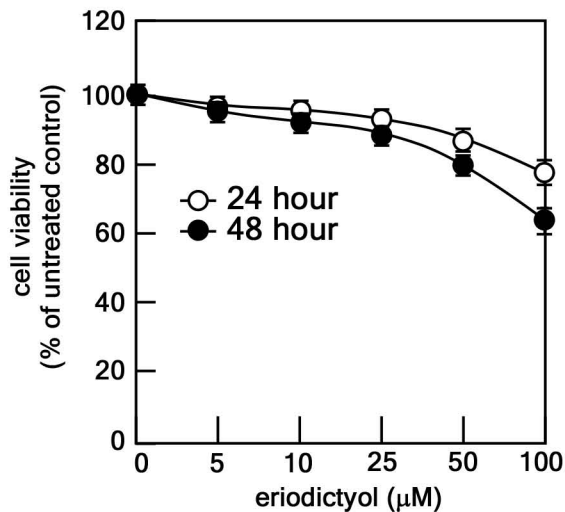

Supplement: supp_M110.147306_jbc.M110.147306-3.pdf [file supp_M110.147306_jbc.M110.147306-3.pdf]

A

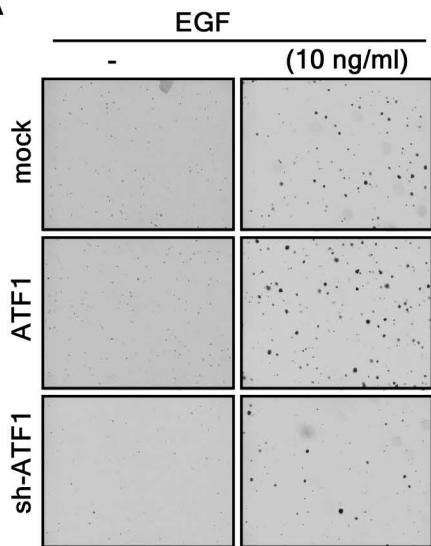

B

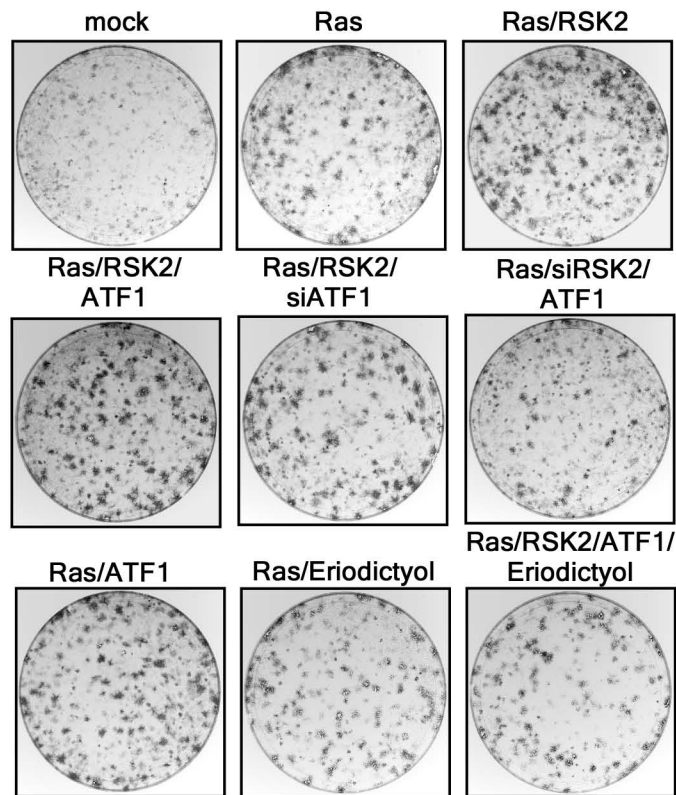

C

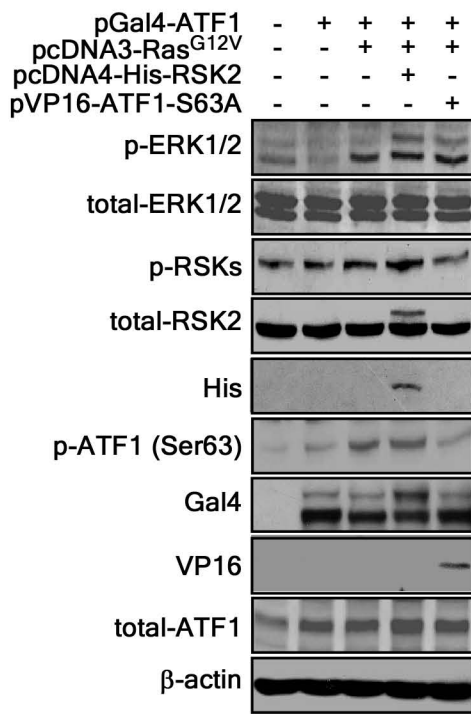

Supplement: supp_M110.147306_jbc.M110.147306-4.pdf [file supp_M110.147306_jbc.M110.147306-4.pdf]
